# Supplementary material for: Novel Classification of Early-stage Systemic Hypertensive Changes in Human Retina Based on OCTA Measurement of Choriocapillaris
Source: PubMed Central journal article supplement (PMC6181956; doi:10.1038/s41598-018-33580-y), 2018-10-11
Supplement: 41598_2018_33580_MOESM1_ESM.pdf [file 41598_2018_33580_MOESM1_ESM.pdf]

## **Novel Classification of Early-stage Systemic Hypertensive Changes Based on OCTA Measurement of Choriocapillaris**

Kei Takayama, Hiroki Kaneko, Yasuki Ito, Keiko Kataoka, Takeshi Iwase,  
Tetsuhiro Yasuma, Toshiyuki Matsuura, Taichi Tsunekawa, Hideyuki Shimizu,  
Ayana Suzumura, Eimei Ra, Tomohiko Akahori, Hiroko Terasaki

**Supplementary Table S1. Normative choriocapillaris vasculature in each ETDRS sector of right eyes**

|                            | Fovea      | Nasal      | Superior   | Temporal   | Inferior   | Total      |
|----------------------------|------------|------------|------------|------------|------------|------------|
| VD (%)                     | 43.1 ± 3.0 | 42.1 ± 2.3 | 42.0 ± 1.8 | 44.0 ± 2.2 | 42.8 ± 1.9 | 42.9 ± 1.1 |
| VL (mm / mm <sup>2</sup> ) | 21.3 ± 1.5 | 22.4 ± 1.5 | 22.7 ± 1.3 | 23.2 ± 1.4 | 22.9 ± 1.3 | 22.4 ± 1.1 |
| VDI (µm)                   | 20.2 ± 1.1 | 18.8 ± 0.9 | 18.5 ± 0.8 | 19.2 ± 0.8 | 18.7 ± 0.9 | 19.0 ± 0.7 |

VD: vessel density, VL: vessel length, VDI: vessel diameter index

**Supplementary Table S2. Normative vessel density in right and left eye**

|               | Fovea      | Nasal      | Superior   | Temporal   | Inferior   | Total      |
|---------------|------------|------------|------------|------------|------------|------------|
| <b>All</b>    |            |            |            |            |            |            |
| Right eye     | 43.4 ± 3.1 | 42.4 ± 2.5 | 42.0 ± 1.8 | 44.4 ± 1.9 | 42.7 ± 2.1 | 43.0 ± 2.1 |
| Left eye      | 43.8 ± 3.0 | 44.4 ± 1.9 | 42.5 ± 1.9 | 43.5 ± 1.9 | 43.0 ± 1.9 | 43.4 ± 1.9 |
| P value       | 0.47       | <0.001     | 0.25       | 0.0096     | 0.39       | 0.068      |
| <b>Male</b>   |            |            |            |            |            |            |
| Right eye     | 42.7 ± 3.3 | 42.6 ± 2.4 | 42.1 ± 1.9 | 44.3 ± 1.9 | 42.3 ± 2.3 | 42.9 ± 1.2 |
| Left eye      | 43.2 ± 2.7 | 44.5 ± 1.9 | 42.3 ± 1.8 | 43.4 ± 2.3 | 42.9 ± 1.9 | 43.2 ± 0.9 |
| P value       | 0.43       | 0.0066     | 0.81       | 0.045      | 0.37       | 0.26       |
| <b>Female</b> |            |            |            |            |            |            |
| Right eye     | 44.1 ± 2.9 | 42.3 ± 2.6 | 41.9 ± 1.8 | 44.5 ± 1.9 | 43.1 ± 2.0 | 43.1 ± 1.1 |
| Left eye      | 44.4 ± 3.2 | 43.2 ± 1.9 | 42.6 ± 1.9 | 43.5 ± 1.9 | 43.2 ± 1.9 | 43.5 ± 1.0 |
| P value       | 0.73       | 0.0053     | 0.16       | 0.046      | 0.62       | 0.16       |

Statistically analyzed by Mann-Whitney *U* test

**Supplementary Table S3. Normative vessel length in right and left eye and classification into male and female.**

|           | Fovea      | Nasal      | Superior   | Temporal   | Inferior   | Total      |
|-----------|------------|------------|------------|------------|------------|------------|
| All       |            |            |            |            |            |            |
| Right eye | 21.3 ± 1.3 | 22.4 ± 1.8 | 22.5 ± 1.4 | 23.0 ± 1.4 | 22.7 ± 1.5 | 22.5 ± 1.2 |
| Left eye  | 21.7 ± 1.5 | 23.5 ± 1.3 | 23.1 ± 1.7 | 23.1 ± 1.5 | 23.0 ± 1.2 | 23.0 ± 1.2 |
| P value   | 0.21       | 0.0017     | 0.051      | 0.73       | 0.12       | 0.031      |
| Male      |            |            |            |            |            |            |
| Right eye | 21.1 ± 1.3 | 22.7 ± 1.5 | 22.4 ± 1.4 | 22.7 ± 1.3 | 22.5 ± 1.4 | 22.4 ± 1.1 |
| Left eye  | 21.5 ± 1.4 | 23.1 ± 1.3 | 22.8 ± 1.2 | 23.0 ± 1.6 | 22.8 ± 1.3 | 22.7 ± 1.1 |
| P value   | 0.47       | 0.33       | 0.37       | 0.62       | 0.37       | 0.31       |
| Female    |            |            |            |            |            |            |
| Right eye | 21.4 ± 1.4 | 22.1 ± 1.9 | 22.5 ± 1.5 | 23.2 ± 1.4 | 22.8 ± 1.6 | 22.5 ± 1.3 |
| Left eye  | 21.9 ± 1.5 | 23.8 ± 1.3 | 23.3 ± 1.7 | 23.1 ± 1.8 | 23.3 ± 1.7 | 23.2 ± 1.3 |
| P value   | 0.30       | 0.0017     | 0.069      | 0.90       | 0.21       | 0.058      |

Statistically analyzed by Mann-Whitney *U* test

**Supplementary Table S4. Normative vessel diameter index in right and left eye and classification into male and female.**

|               | Fovea      | Nasal      | Superior   | Temporal   | Inferior   | Total      |
|---------------|------------|------------|------------|------------|------------|------------|
| <b>All</b>    |            |            |            |            |            |            |
| Right eye     | 20.4 ± 1.2 | 19.0 ± 1.0 | 18.7 ± 1.0 | 19.3 ± 0.8 | 18.9 ± 1.0 | 19.1 ± 0.7 |
| Left eye      | 20.3 ± 1.3 | 19.0 ± 0.9 | 18.5 ± 0.9 | 18.9 ± 1.0 | 18.7 ± 1.1 | 18.9 ± 0.8 |
| P value       | 0.51       | 0.81       | 0.16       | 0.032      | 0.22       | 0.049      |
| <b>Male</b>   |            |            |            |            |            |            |
| Right eye     | 20.2 ± 1.1 | 18.8 ± 0.8 | 18.7 ± 1.0 | 19.5 ± 0.9 | 18.8 ± 0.8 | 19.1 ± 0.6 |
| Left eye      | 20.2 ± 1.3 | 19.3 ± 0.7 | 18.6 ± 0.9 | 18.9 ± 0.9 | 18.8 ± 0.8 | 19.0 ± 0.7 |
| P value       | 0.78       | 0.07       | 0.47       | 0.022      | 0.89       | 0.57       |
| <b>Female</b> |            |            |            |            |            |            |
| Right eye     | 20.6 ± 1.3 | 19.2 ± 1.1 | 18.6 ± 1.0 | 19.2 ± 0.8 | 18.9 ± 1.1 | 19.2 ± 0.8 |
| Left eye      | 20.3 ± 1.2 | 18.7 ± 1.0 | 18.3 ± 0.9 | 18.9 ± 1.2 | 18.6 ± 1.2 | 18.8 ± 0.9 |
| P value       | 0.57       | 0.06       | 0.25       | 0.046      | 0.13       | 0.036      |

Statistically analyzed by non-repeated measures ANOVA

**Supplementary Table S5. Outcomes of choriocapillaris vasculature in the three groups**

|                                 | Fovea      | Nasal      | Superior   | Temporal   | Inferior   | Total      |
|---------------------------------|------------|------------|------------|------------|------------|------------|
| <b>Vessel density</b>           |            |            |            |            |            |            |
| Grade 0                         | 44.0 ± 2.5 | 42.6 ± 1.9 | 42.0 ± 1.7 | 44.6 ± 1.9 | 42.8 ± 1.8 | 43.1 ± 0.9 |
| Grade 1                         | 42.5 ± 2.9 | 41.9 ± 2.8 | 42.0 ± 1.8 | 43.9 ± 2.7 | 42.2 ± 3.1 | 42.5 ± 1.4 |
| Grade 2                         | 40.8 ± 3.6 | 38.3 ± 4.3 | 41.5 ± 2.2 | 42.7 ± 3.2 | 42.0 ± 2.3 | 41.1 ± 1.7 |
| P value <sup>#</sup>            | <0.001     | <0.001     | 0.29       | 0.0027     | 0.066      | <0.001     |
| <b>Difference between grade</b> |            |            |            |            |            |            |
| Grade0/Grade1                   | **         |            |            |            |            | **         |
| Grade0/Grade2                   | **         | **         |            | *          |            | **         |
| Grade1/Grade2                   | *          | **         |            |            |            | **         |
| <b>Vessel length</b>            |            |            |            |            |            |            |
| Grade 0                         | 21.7 ± 1.3 | 22.7 ± 1.4 | 22.9 ± 1.3 | 23.4 ± 1.3 | 23.0 ± 1.2 | 22.9 ± 1.1 |
| Grade 1                         | 21.2 ± 1.7 | 22.5 ± 1.6 | 22.6 ± 1.2 | 23.0 ± 1.4 | 22.9 ± 1.4 | 22.6 ± 1.1 |
| Grade 2                         | 19.5 ± 2.2 | 21.1 ± 1.6 | 21.9 ± 0.8 | 21.4 ± 1.7 | 22.1 ± 1.0 | 21.4 ± 1.2 |
| P value <sup>#</sup>            | <0.001     | <0.001     | 0.014      | <0.001     | 0.033      | <0.001     |
| <b>Difference between grade</b> |            |            |            |            |            |            |
| Grade0/Grade1                   | *          |            |            |            |            |            |
| Grade0/Grade2                   | **         | **         | *          | **         |            | **         |
| Grade1/Grade2                   | **         | **         |            | **         |            | **         |
| <b>Vessel diameter index</b>    |            |            |            |            |            |            |
| Grade 0                         | 20.3 ± 1.1 | 18.8 ± 0.8 | 18.4 ± 0.8 | 19.1 ± 0.8 | 18.7 ± 1.1 | 18.9 ± 0.7 |
| Grade 1                         | 20.1 ± 0.9 | 18.7 ± 0.7 | 18.6 ± 0.9 | 19.1 ± 0.7 | 18.5 ± 1.4 | 18.9 ± 0.7 |
| Grade 2                         | 21.0 ± 1.4 | 18.2 ± 1.7 | 19.0 ± 1.1 | 19.9 ± 1.1 | 19.0 ± 0.8 | 19.2 ± 0.6 |
| P value <sup>#</sup>            | 0.027      | 0.051      | 0.010      | 0.001      | 0.23       | 0.12       |
| <b>Difference between grade</b> |            |            |            |            |            |            |
| Grade0/Grade1                   |            |            |            |            |            |            |
| Grade0/Grade2                   | *          |            |            | **         |            |            |
| Grade1/Grade2                   | *          |            | *          | **         |            |            |

<sup>#</sup>: analyzed between the 3 groups by non-repeated measures ANOVA, \*: P < 0.05 \*\*: P < 0.01 by SNK test.
